# Supplementary material
Source: PubMed Central journal article supplement (PMC1726030)
Supplement: emermedj_20_1_88__1.pdf [file emermedj_20_1_88__1.pdf]

## Questionnaire to Identify Domestic Patterns of Paracetamol Use

Your child is attending the A&E Department with a high temperature.

We would be grateful if you would take part in this study about using paracetamol.

AGE \_\_\_\_\_. SEX \_\_\_\_\_. A&E NUMBER \_\_\_\_\_. TEMP \_\_\_\_\_.

Have you given your child any paracetamol since they have been unwell? Yes / No

How many teaspoons did you give? \_\_\_ teaspoons

Of what preparation? (e.g. Calpol, Disprol, Medinol) \_\_\_\_\_..

How often can you give paracetamol to your child if necessary? \_\_\_\_\_. Hourly

What do you normally use paracetamol for at home?

**(circle as many as needed)**

a) To help my child sleep? Yes / No

b) For a high temperature? Yes / No

c) For pain from any cause? Yes / No

d) I never use it at home? Yes / No

Other (please state) \_\_\_\_\_..

5. If you did not give your child any paracetamol at home this time was it because:

**(circle as many as needed)**

a) We have none at home Yes / No

b) I do not like giving medication to my child Yes / No

c) I did not know paracetamol would have helped Yes / No

d) I never thought to use paracetamol Yes / No

e) I wanted to check with the doctor before using it Yes / No

f) I usually use a different type of pain killer Yes / No

g) My child was vomiting Yes / No

Other reason \_\_\_\_\_

***Thankyou for your cooperation with this study***
